# Supplementary material for: Differential α-amylase/α-glucosidase inhibitory activities of plant-derived phenolic compounds: a virtual screening perspective for the treatment of obesity and diabetes
Source: Royal Society of Chemistry journal article supplement (doi:10.1039/c7fo00220c), 2017-01-01
Supplement: c7fo00220c1.pdf [file c7fo00220c1.pdf]

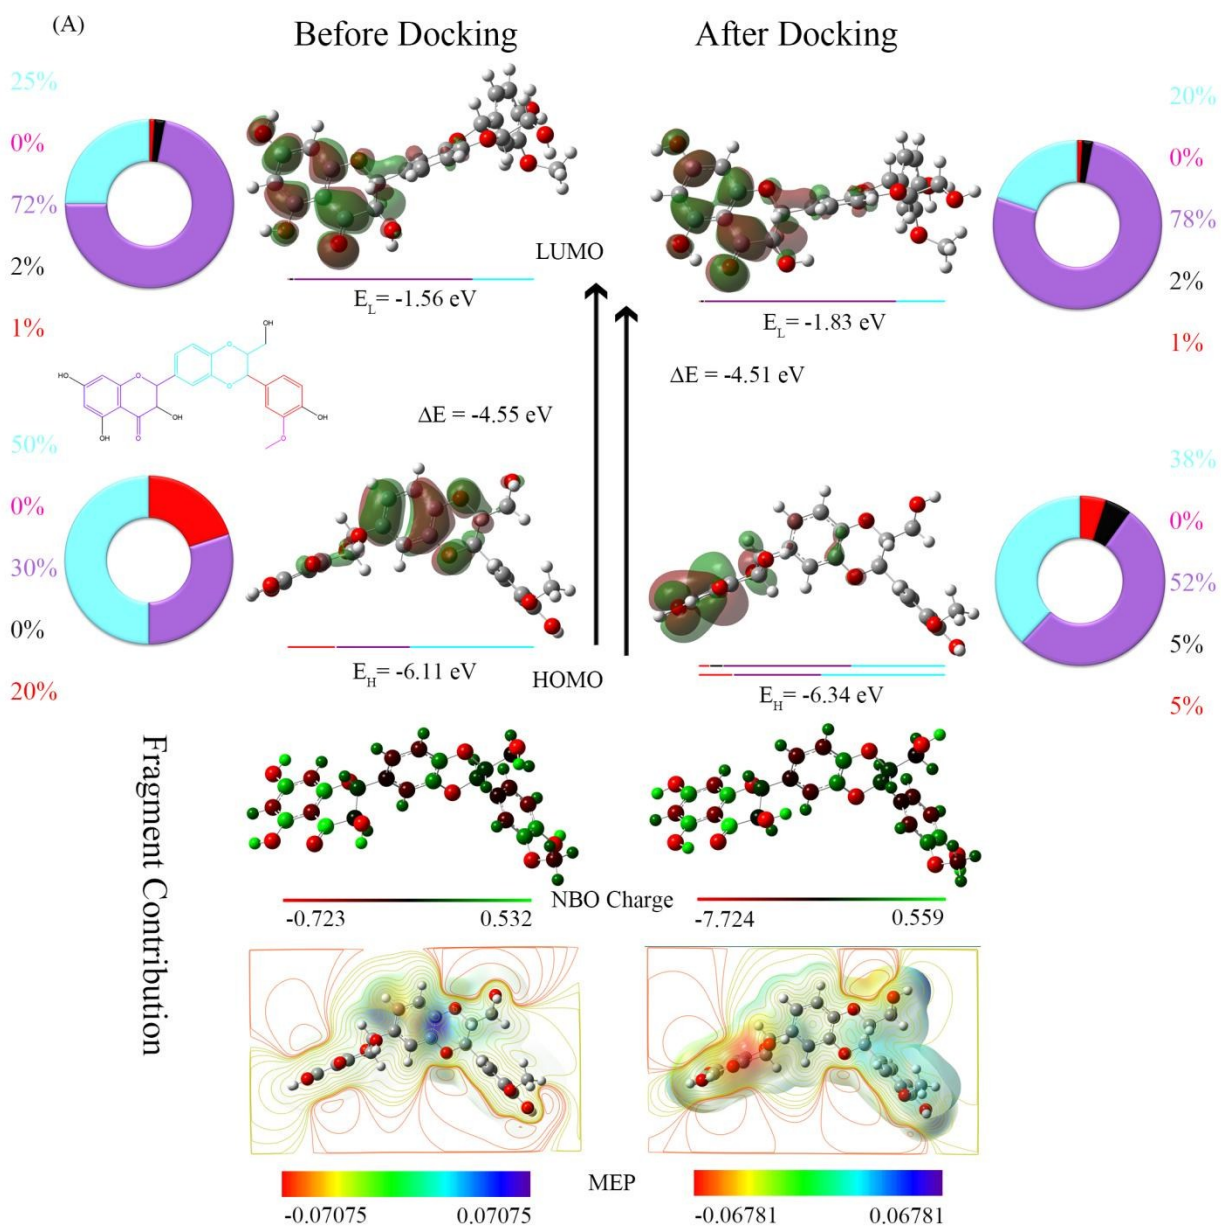

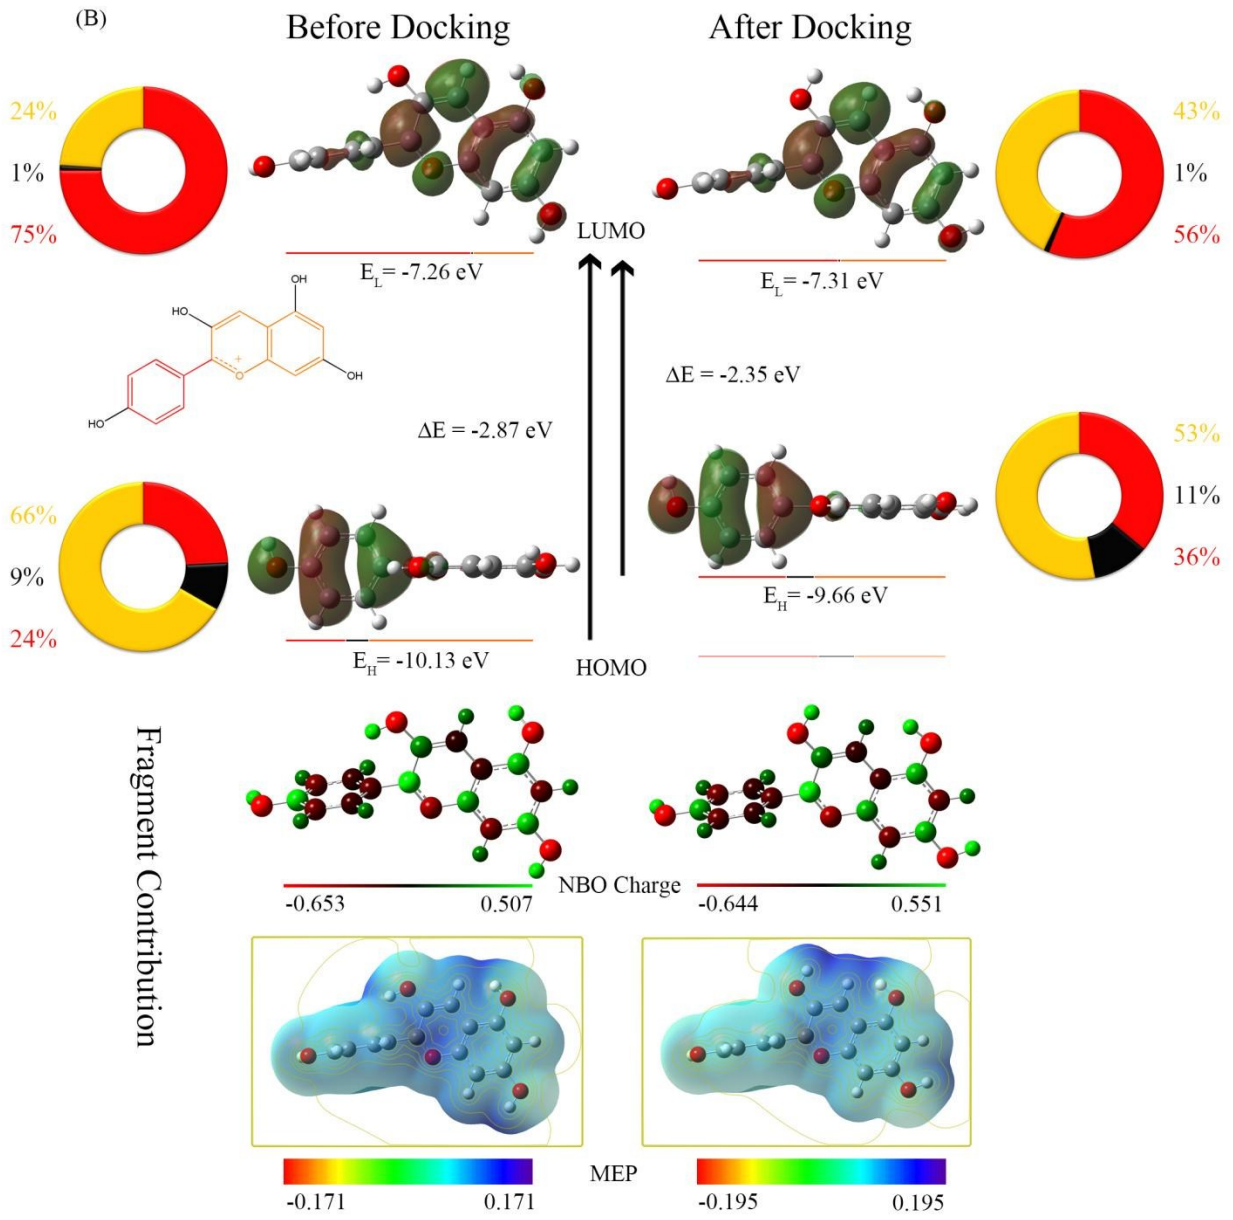

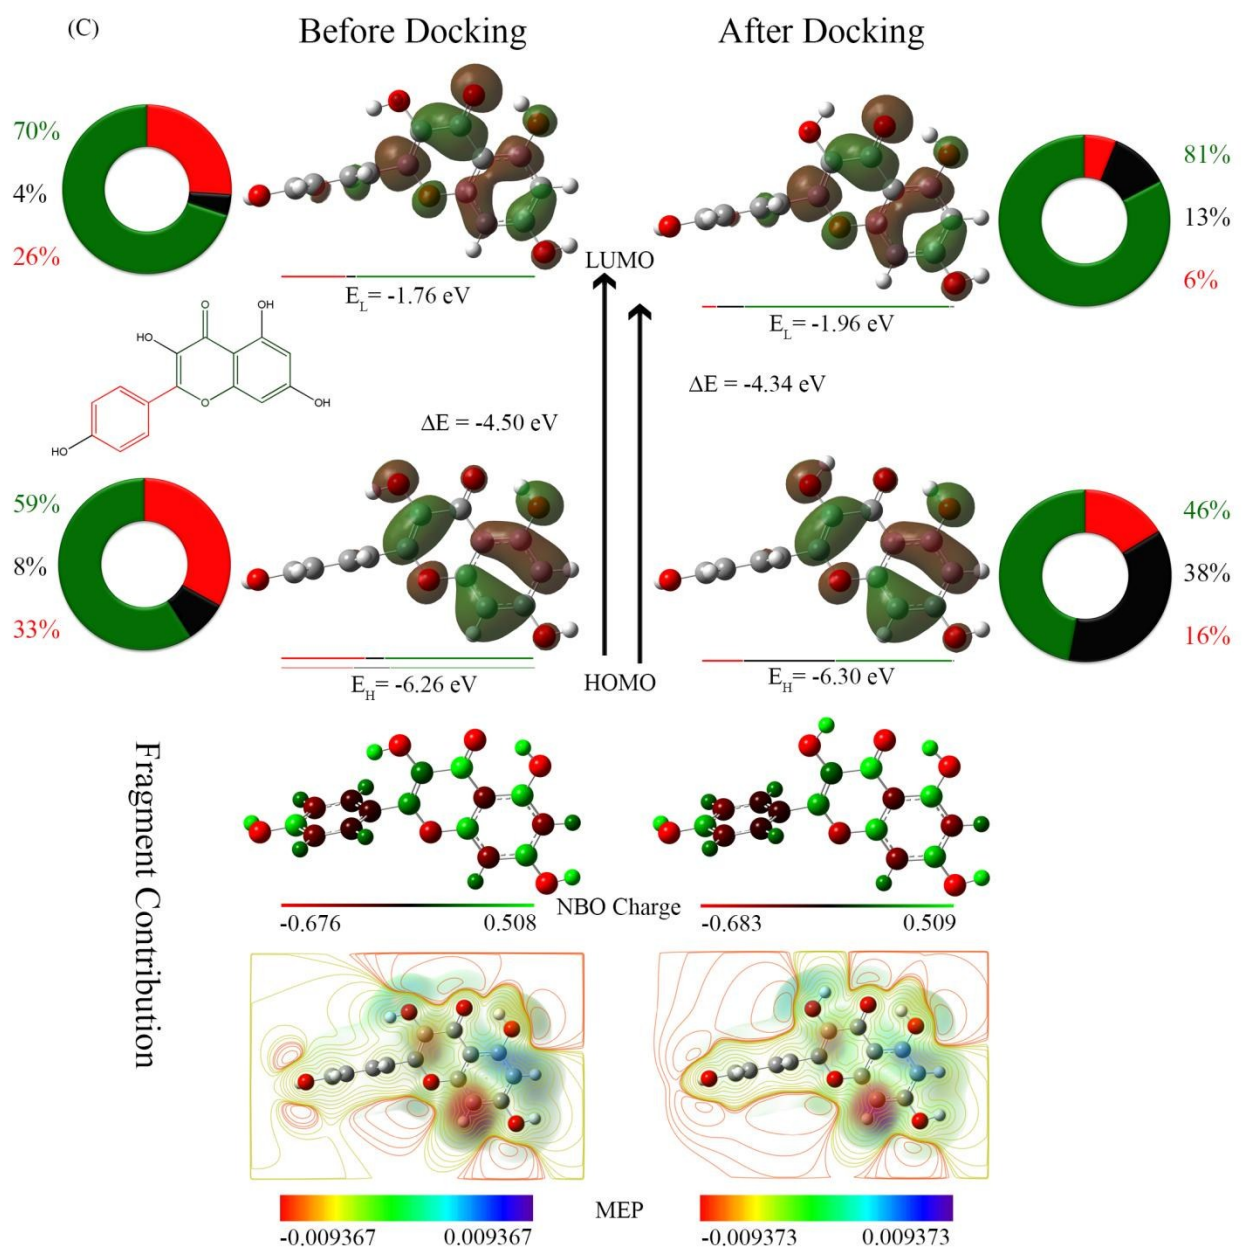

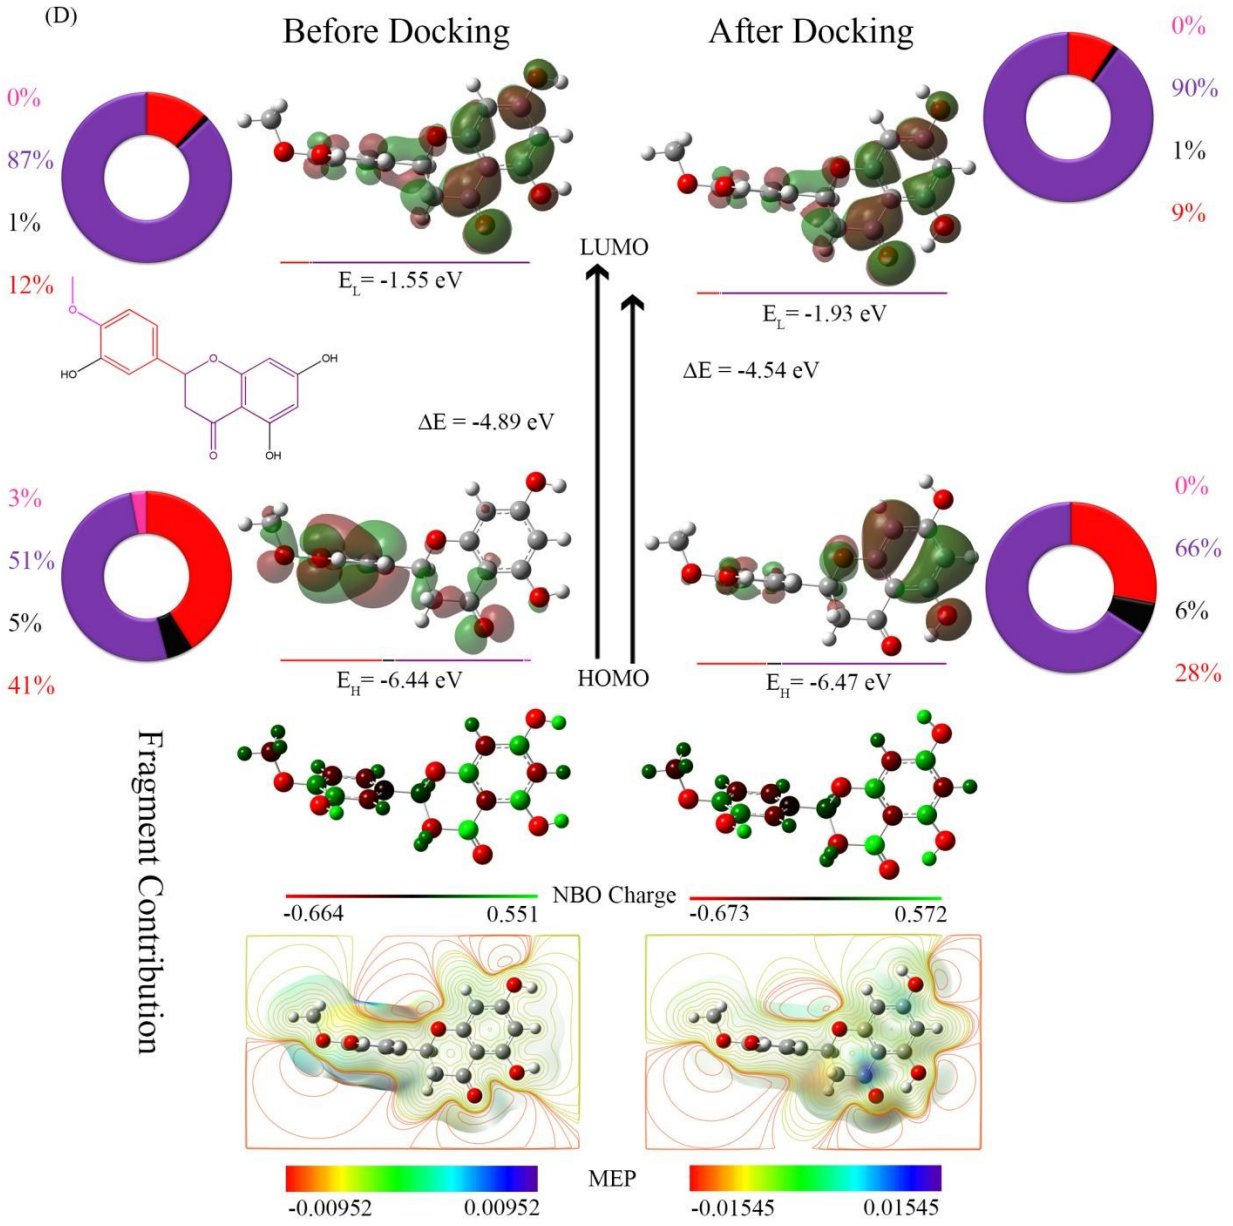

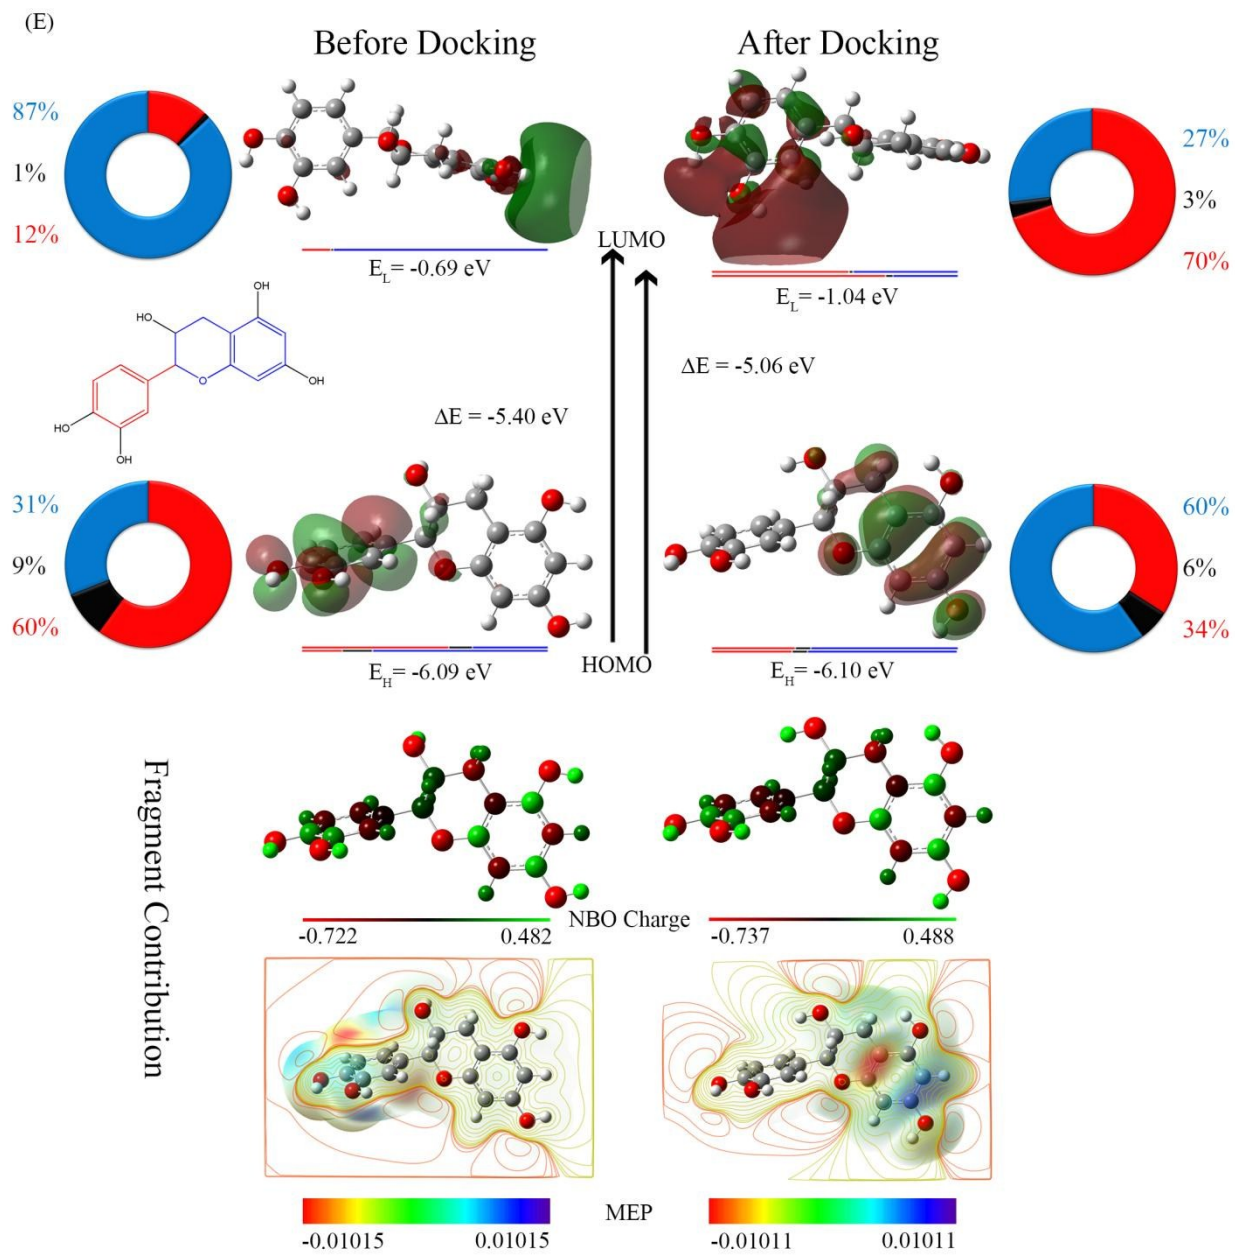

Figure S1. The quantum chemical descriptors and NBO charges for (A) silibinin (B) pelargonidin (C) kaempferol (D) hesperetin and (E) catechin interacted with  $\alpha$ A receptor.

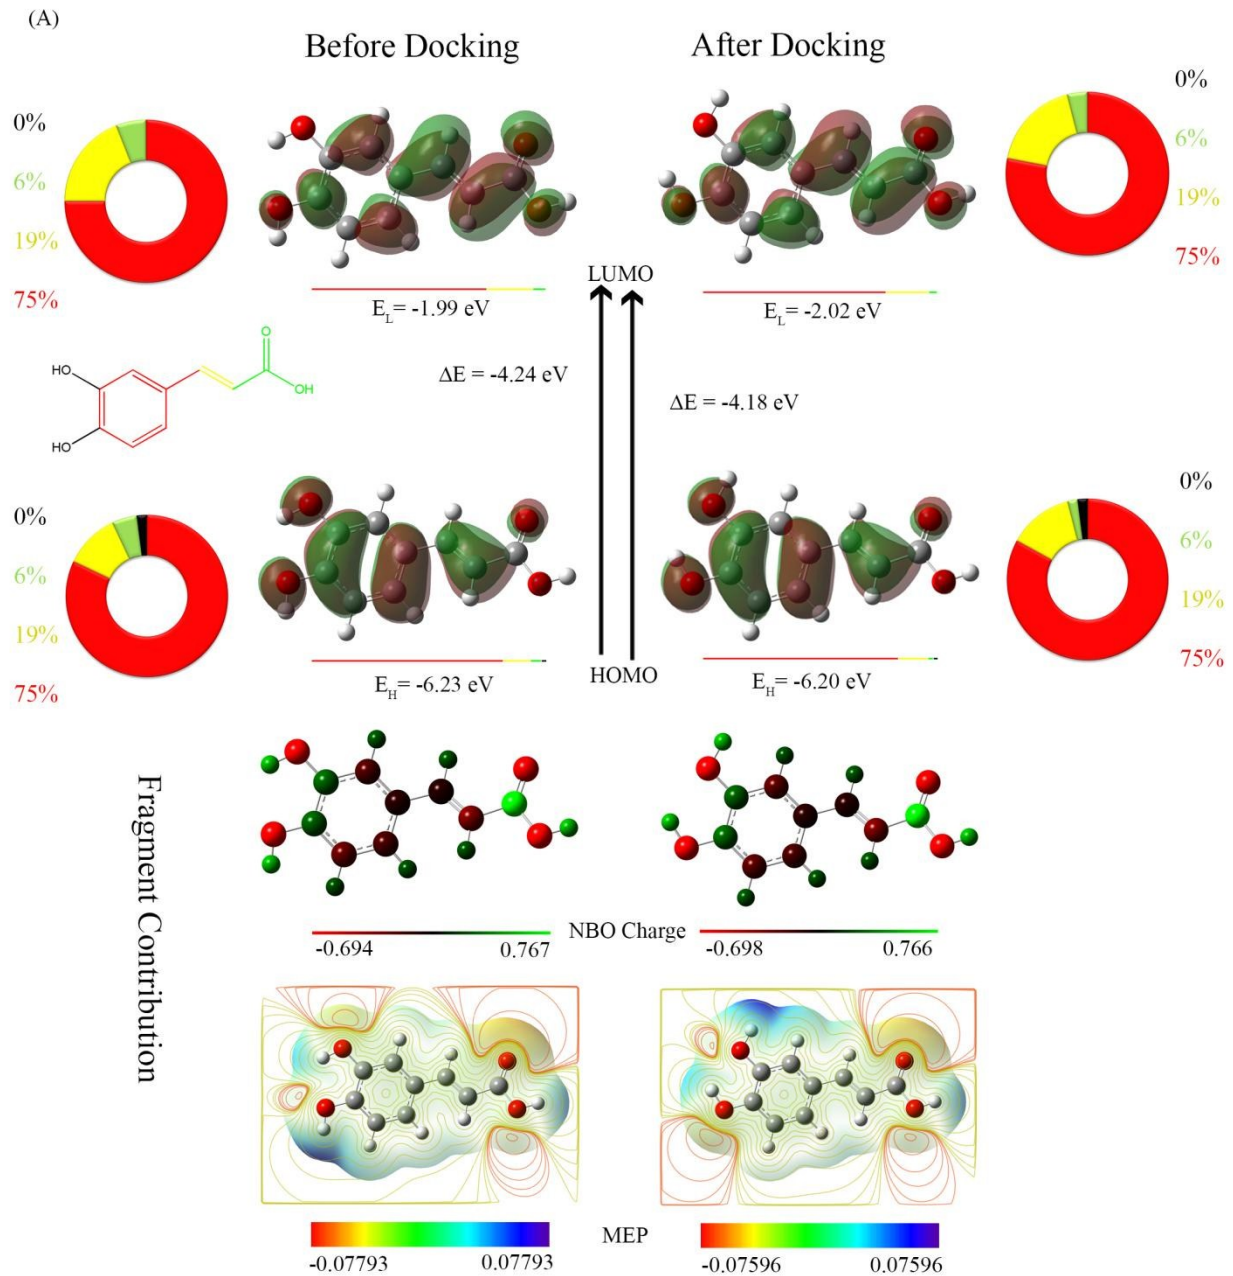

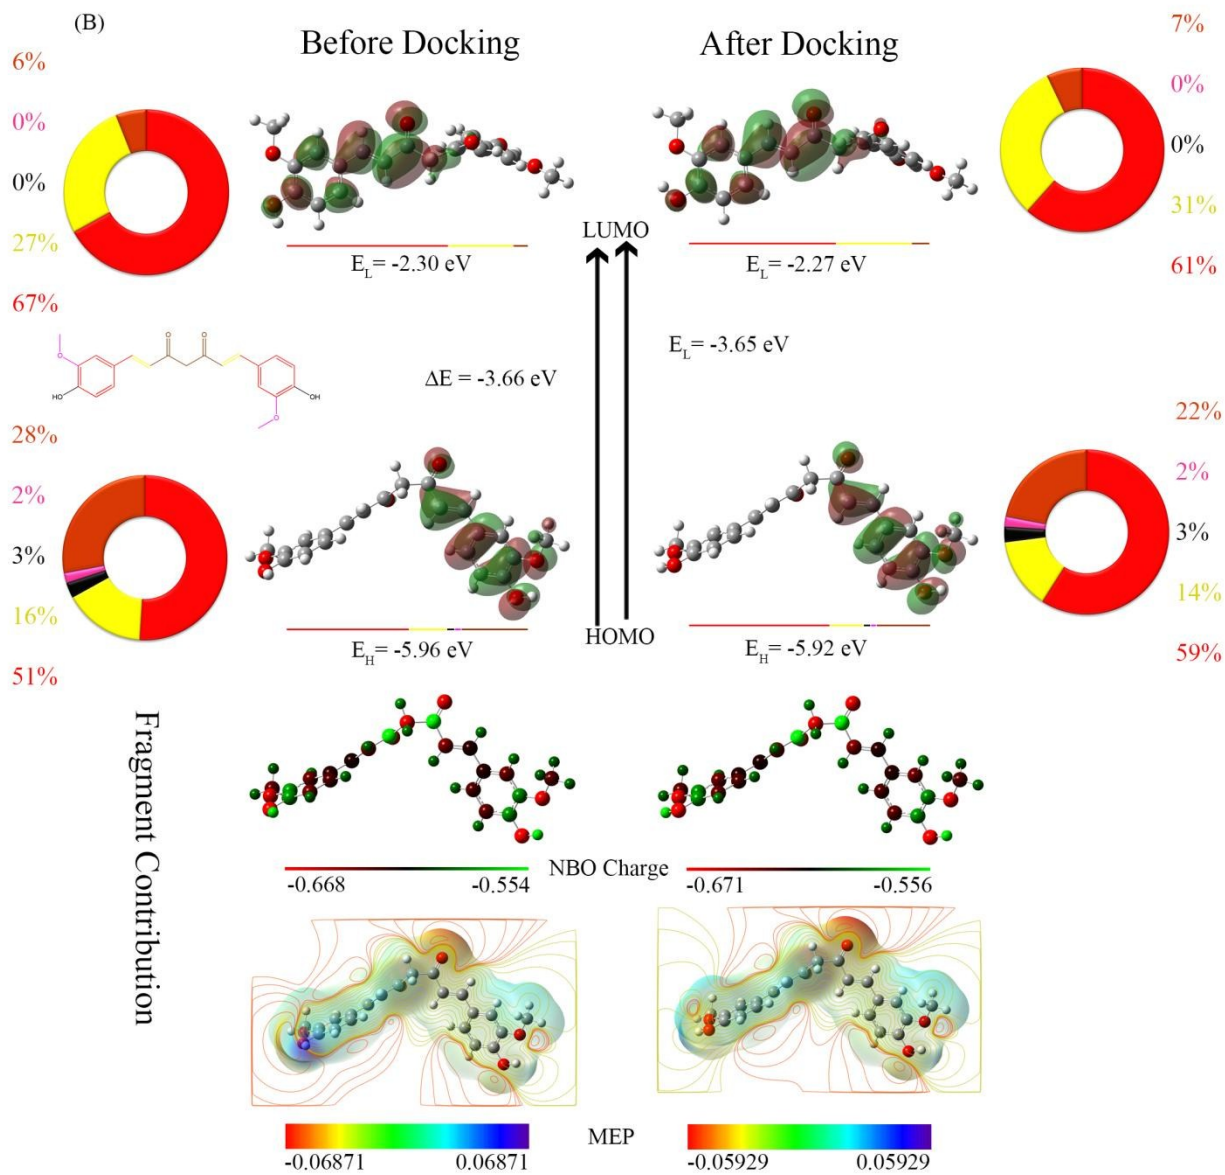





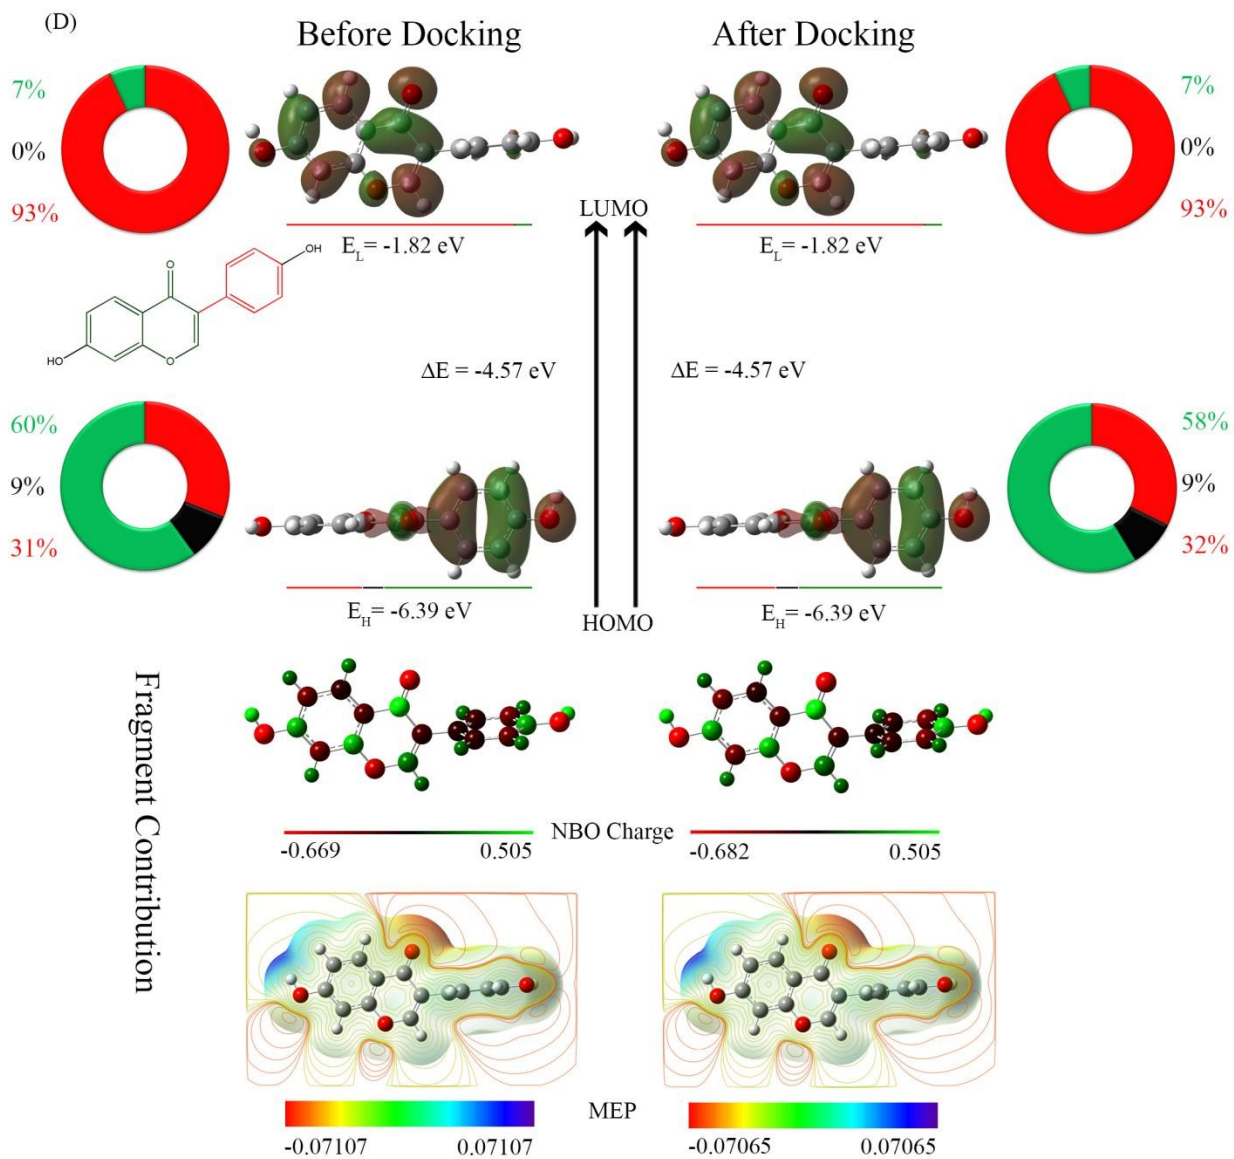

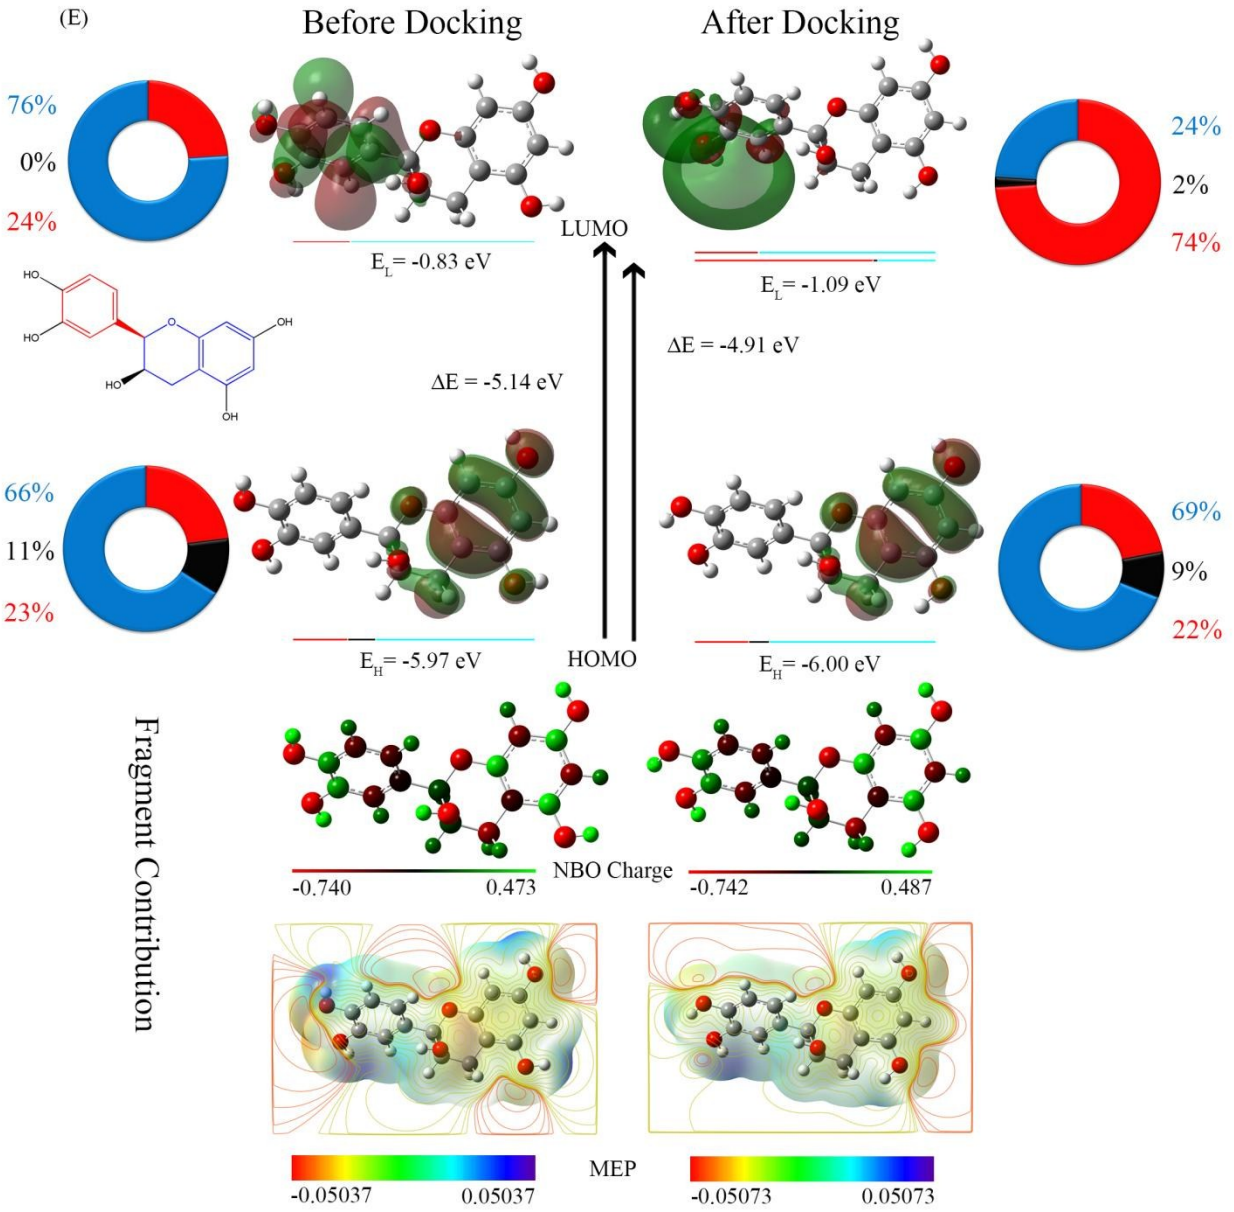

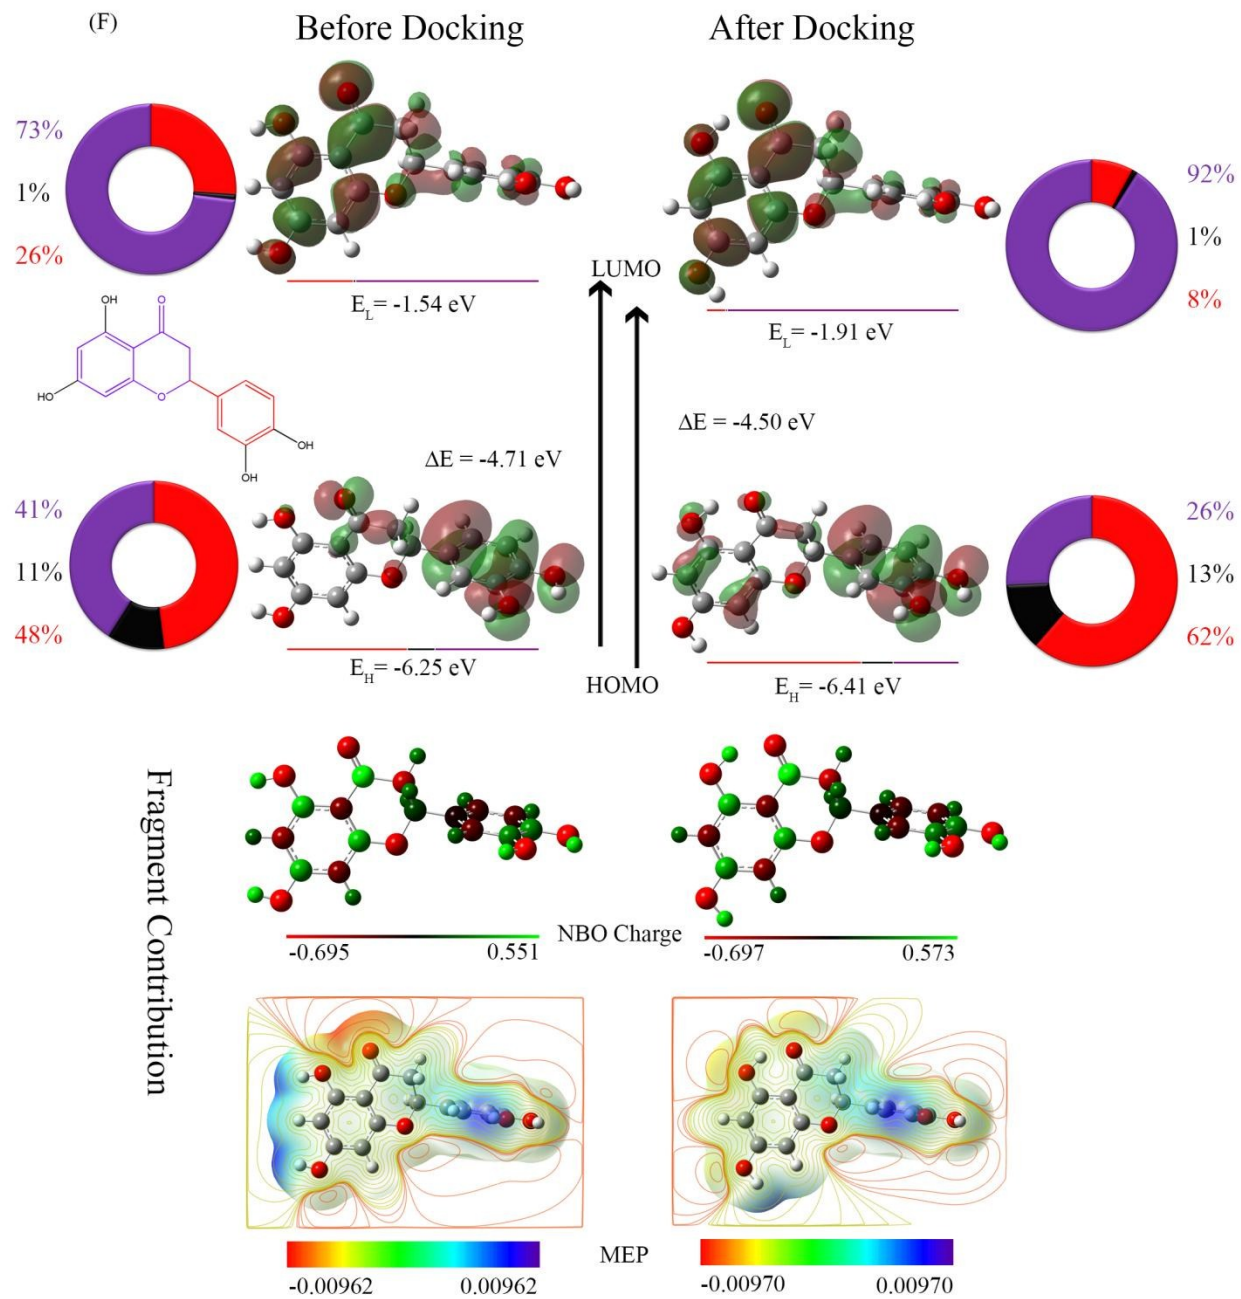

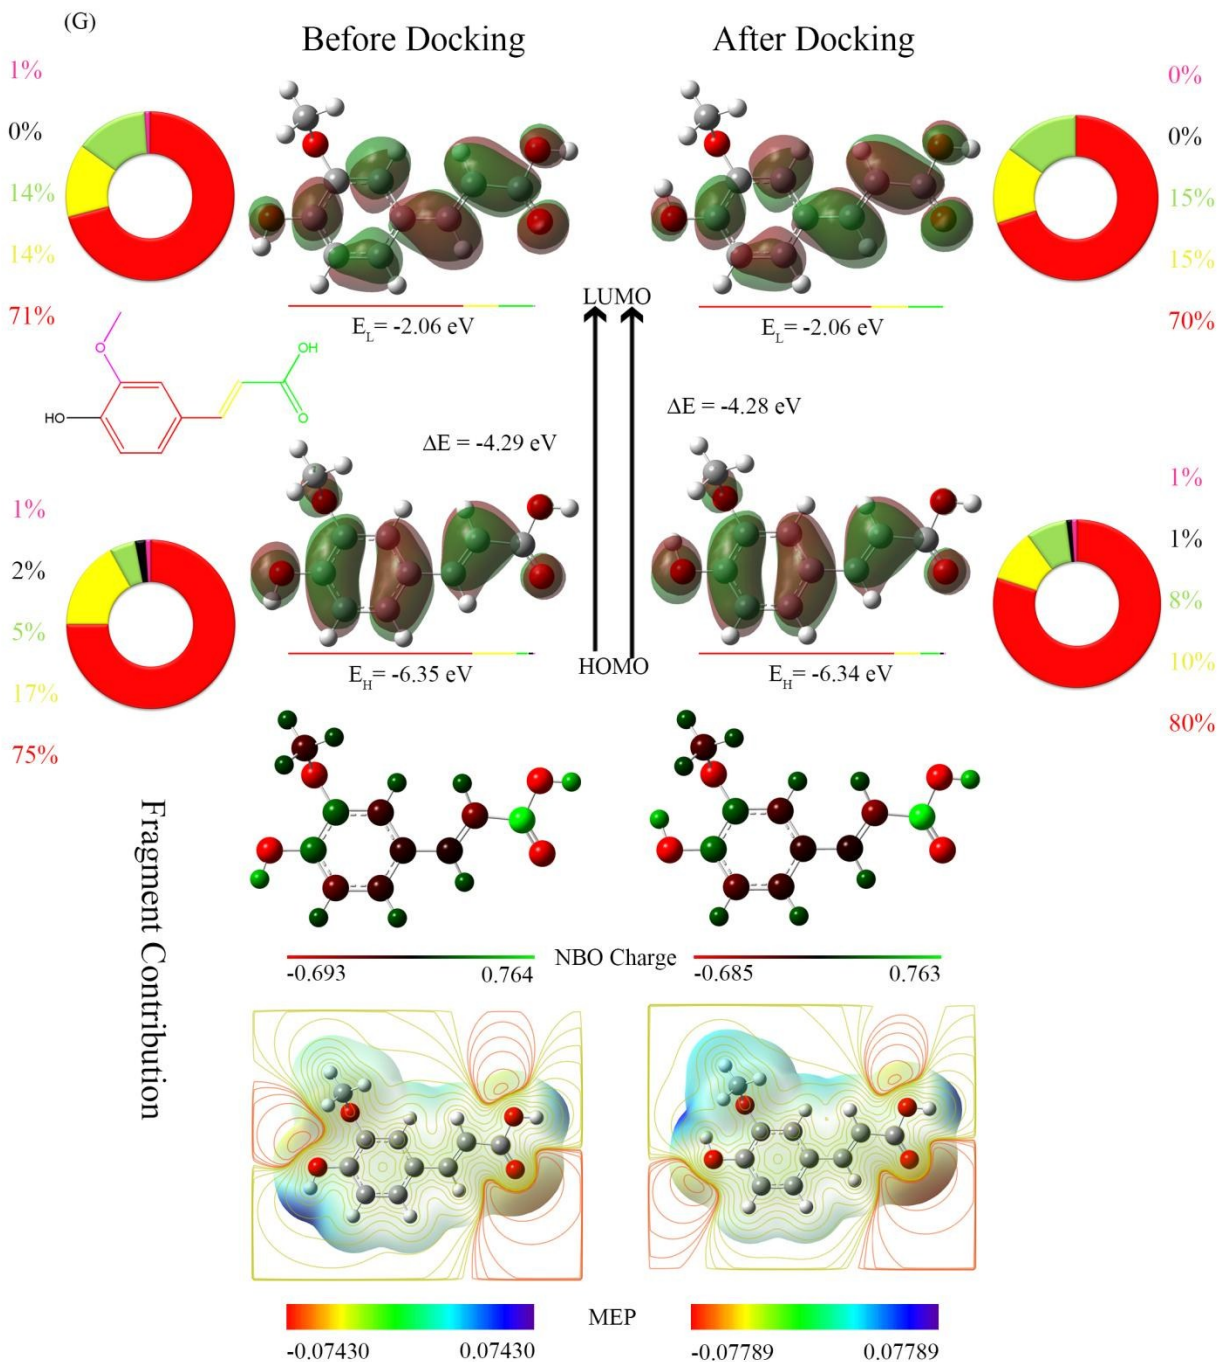

Figure S2. The quantum chemical descriptors and NBO charges for (A) caffeic acid (B) curcumin (C) cyanidin (D) daidzein (E) epicatechin (F) eriodictyol interacted and (G) frolic acid with  $\alpha$ G receptor.
